# Supplementary material
Source: publisher figshare collection journal article supplement (https://asha.figshare.com/articles/dataset/_/27964515)

**Supplemental Material S9.** Self-perceived knowledge and comfort graphs, including 2-SD band, for Participant 8.

**Participant 8 – Self-Perceived Knowledge in Palliative Care**

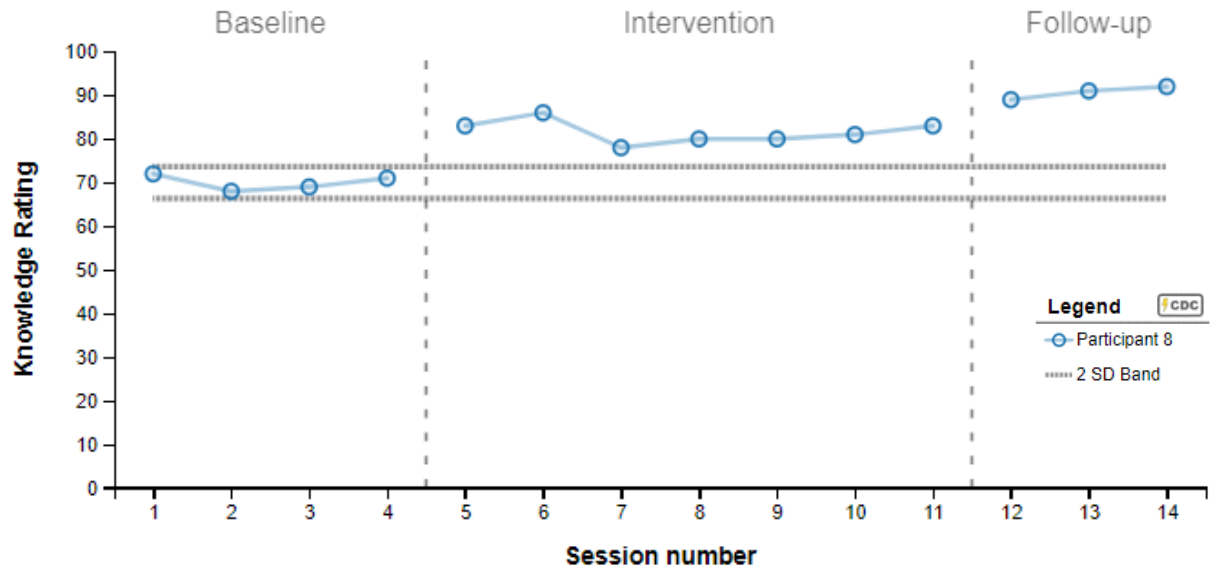

**Participant 8 – Self-Perceived Comfort in Palliative Care**

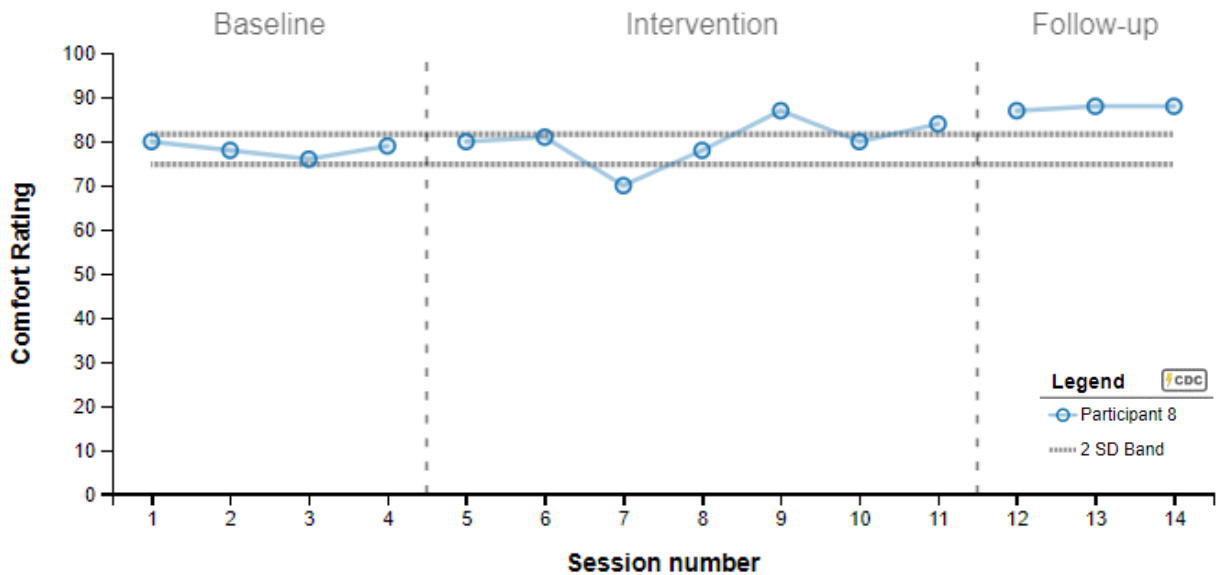

Supplement: Supplementary file 6 [file 2]
