# Supplementary material
Source: publisher figshare collection journal article supplement (https://asha.figshare.com/articles/dataset/_/27964515)
Supplement: Supplementary file 9 [file 2]

**Supplemental Material S1.** Example of electronic visual analog scale utilized during study.

Q1 List your Participant number

Q2 Rate your knowledge of palliative care concepts.

Knowledge is defined as familiarity with and ability to define a concept.

|           |             |
|-----------|-------------|
| Knowledge | <div></div> |
|-----------|-------------|

Q3 Rate your comfort.

Comfort is defined as sense of ease and lack of distress in reaction to a palliative care environment and situation.

|         |             |
|---------|-------------|
| Comfort | <div></div> |
|---------|-------------|

Q4 Do you attest that you have reviewed the above ratings and they are accurate.

- ☐ Yes
- ☐ No
