# Supplementary material
Source: publisher figshare collection journal article supplement (https://asha.figshare.com/articles/dataset/_/27964515)

Supplemental Material S6. Self-perceived knowledge and comfort graphs, including 2-SD band, for Participant 5.

### Participant 5 – Self-Perceived Knowledge in Palliative Care

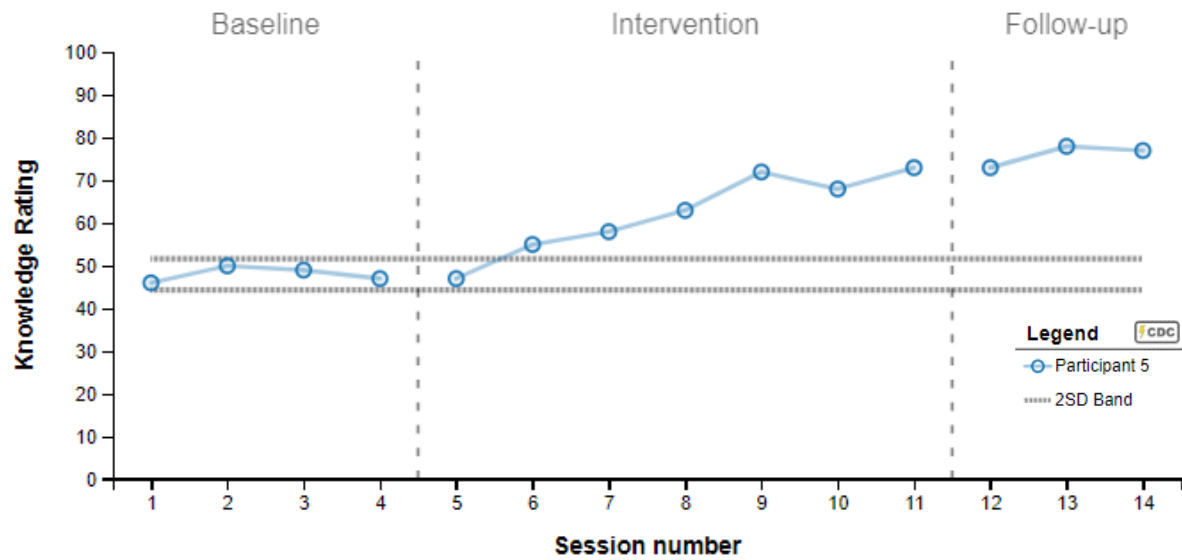

### Participant 5 – Self-Perceived Comfort in Palliative Care

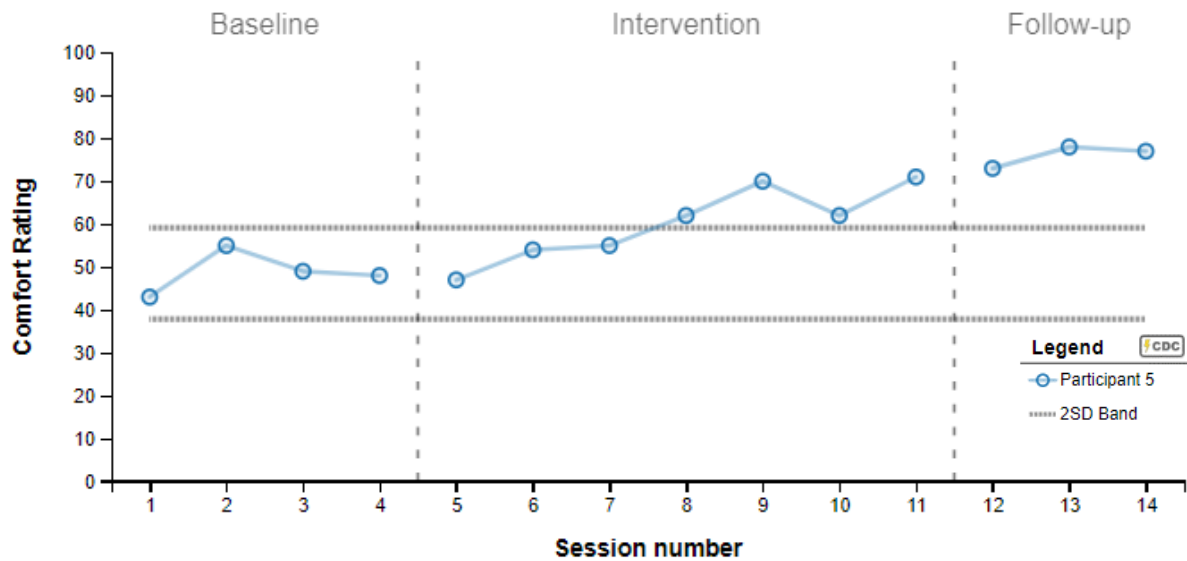

Supplement: Supplementary file 10 [file 2]
